# Supplementary material for: Population analysis of Vibrio parahaemolyticus originating from different geographical regions demonstrates a high genetic diversity
Source: PubMed Central journal article supplement (PMC4015679; doi:10.1186/1471-2180-14-59), 2014-03-08
Supplement: 1471-2180-14-59-S1.pdf [file 1471-2180-14-59-S1.pdf]

**Table S1: Characteristics and allelic profiles of *V. parahaemolyticus* strains included within this study.**

| id <sup>B</sup> | Origin                   |      |                     | Allelic profile <sup>A</sup>       |                         |            |            |
|-----------------|--------------------------|------|---------------------|------------------------------------|-------------------------|------------|------------|
|                 | Country, Region          | Year | Source <sup>C</sup> | Nucleotide                         | Peptide                 | ST         | pST        |
| 816             | Sri Lanka, Chillaw       | 2010 | Prawn               | 11-75-64-50-26-7-50                | 2-1-1-1-1-1-1           | <b>409</b> | 2          |
| 817             | Sri Lanka, Chillaw       | 2010 | Prawn               | 11-75-64-50-26-7-50                | 2-1-1-1-1-1-1           | <b>409</b> | 2          |
| 794             | Sri Lanka, Chillaw       | 2010 | Prawn               | <b>166-211-162-183-50-3-57</b>     | 1-1-1-1-1-2-1           | <b>394</b> | 3          |
| 818             | Sri Lanka, Chillaw       | 2010 | Prawn               | 11-75-64-50-26-7-50                | 2-1-1-1-1-1-1           | <b>409</b> | 2          |
| 795             | Sri Lanka, Chillaw       | 2010 | Prawn               | <b>169-104-151-73-26-46-94</b>     | 1-1-1-1-1-3-1           | <b>395</b> | 4          |
| 796             | Sri Lanka, Chillaw       | 2010 | Prawn               | 9- <b>213-165-185-2-46-1</b>       | 2-1-1-1-2-3-1           | <b>396</b> | 20         |
| 791             | Sri Lanka, Chillaw       | 2010 | Prawn               | 9- <b>213-165-185-2-46-1</b>       | 2-1-1-1-2-3-1           | <b>396</b> | 20         |
| 797             | Sri Lanka, Chillaw       | 2010 | Prawn               | 26- <b>218-124-94-23-119-13</b>    | 1-1-1-1-1-1-1           | <b>397</b> | 1          |
| 819             | Sri Lanka, Chillaw       | 2010 | Prawn               | 26- <b>218-124-94-23-119-13</b>    | 1-1-1-1-1-1-1           | <b>397</b> | 1          |
| 792             | Sri Lanka, Chillaw       | 2010 | Prawn               | 26- <b>218-124-94-23-119-13</b>    | 1-1-1-1-1-1-1           | <b>397</b> | 1          |
| 798             | Sri Lanka, Chillaw       | 2010 | Prawn               | <b>165-22-70-177-39-11-115</b>     | 1-1-1- <b>9</b> -1-1-1  | <b>398</b> | <b>85</b>  |
| 820             | Sri Lanka, Puttalam      | 2011 | Prawn               | 153-191-70-19-23-8-1               | 1-1-1-1-1-1-1           | 355        | 1          |
| 821             | Sri Lanka, Puttalam      | 2011 | Prawn               | <b>166-211-162-183-50-3-57</b>     | 1-1-1-1-1-2-1           | <b>394</b> | 3          |
| 822             | Sri Lanka, Puttalam      | 2011 | Prawn               | <b>166-211-162-183-50-3-57</b>     | 1-1-1-1-1-2-1           | <b>394</b> | 3          |
| 799             | Sri Lanka, Puttalam      | 2011 | Prawn               | <b>166-211-162-183-50-3-57</b>     | 1-1-1-1-1-2-1           | <b>394</b> | 3          |
| 823             | Sri Lanka, Puttalam      | 2011 | Prawn               | 153-58-70-19-23-8-1                | 1-1-1-1-1-1-1           | <b>410</b> | 1          |
| 914             | Sri Lanka, Puttalam      | 2011 | Prawn               | <b>166-211-162-183-50-3-57</b>     | 1-1-1-1-1-2-1           | <b>394</b> | 3          |
| 800             | Sri Lanka, Puttalam      | 2011 | Prawn               | 153- <b>216-70-19-23-8-1</b>       | 1-1-1-1-1-1-1           | <b>399</b> | 1          |
| 801             | Sri Lanka, Puttalam      | 2011 | Prawn               | 12- <b>208-159-133-28-128-86</b>   | 2-1-1-1-1-1-1           | <b>400</b> | 2          |
| 824             | Sri Lanka, Puttalam      | 2011 | Prawn               | <b>166-211-162-183-50-3-57</b>     | 1-1-1-1-1-2-1           | <b>394</b> | 3          |
| 802             | Sri Lanka, Puttalam      | 2011 | Prawn               | <b>112-217-145-178-111-160-116</b> | 1-1-1-1- <b>13</b> -1-1 | <b>401</b> | <b>69</b>  |
| 825             | Sri Lanka, Puttalam      | 2011 | Prawn               | 26- <b>218-124-94-23-119-13</b>    | 1-1-1-1-1-1-1           | <b>397</b> | 1          |
| 803             | Sri Lanka, Puttalam      | 2011 | Prawn               | 80-25- <b>160-179-26-10-117</b>    | 1-1-1-1-1-1- <b>20</b>  | <b>402</b> | <b>39</b>  |
| 826             | Sri Lanka, Puttalam      | 2011 | Prawn               | 26- <b>218-124-94-23-119-13</b>    | 1-1-1-1-1-1-1           | <b>397</b> | 1          |
| 804             | Sri Lanka, Puttalam      | 2011 | Prawn               | <b>167-25-25-91-18-57</b>          | 2-1-1-1-1-1-1           | <b>403</b> | 2          |
| 827             | Sri Lanka, Puttalam      | 2011 | Prawn               | <b>166-211-162-183-50-3-57</b>     | 1-1-1-1-1-2-1           | <b>394</b> | 3          |
| 915             | Sri Lanka, Puttalam      | 2011 | Prawn               | <b>166-211-162-183-50-3-57</b>     | 1-1-1-1-1-2-1           | <b>394</b> | 3          |
| 828             | Sri Lanka, Madurankuliya | 2011 | Prawn               | <b>169-104-151-73-26-46-94</b>     | 1-1-1-1-1-3-1           | <b>395</b> | 4          |
| 916             | Sri Lanka, Madurankuliya | 2011 | Prawn               | 26- <b>218-124-94-23-119-13</b>    | 1-1-1-1-1-1-1           | <b>397</b> | 1          |
| 917             | Sri Lanka, Madurankuliya | 2011 | Prawn               | <b>169-104-151-73-26-46-94</b>     | 1-1-1-1-1-3-1           | <b>395</b> | 4          |
| 793             | Sri Lanka, Madurankuliya | 2011 | Prawn               | <b>112-217-145-178-111-160-116</b> | 1-1-1-1- <b>13</b> -1-1 | <b>401</b> | <b>69</b>  |
| 829             | Sri Lanka, Puttalam      | 2011 | Prawn               | <b>169-104-151-73-26-46-94</b>     | 1-1-1-1-1-3-1           | <b>395</b> | 4          |
| 918             | Sri Lanka, Madurankuliya | 2011 | Prawn               | <b>166-211-162-183-50-3-57</b>     | 1-1-1-1-1-2-1           | <b>394</b> | 3          |
| 919             | Sri Lanka, Madurankuliya | 2011 | Prawn               | 26- <b>220-168-159-11-168-122</b>  | 1-1-1-1-1-1-1           | <b>419</b> | 1          |
| 920             | Sri Lanka, Madurankuliya | 2011 | Prawn               | <b>169-104-151-73-26-46-94</b>     | 1-1-1-1-1-3-1           | <b>395</b> | 4          |
| 921             | Sri Lanka, Madurankuliya | 2011 | Prawn               | 153-191-70-19-23-8-1               | 1-1-1-1-1-1-1           | 355        | 1          |
| 922             | Sri Lanka, Puttalam      | 2011 | Prawn               | <b>131-221-163-150-114-163-26</b>  | 1-1-1-1-1-1-1           | <b>420</b> | 1          |
| 830             | Sri Lanka, Puttalam      | 2011 | Prawn               | 26- <b>218-124-94-23-119-13</b>    | 1-1-1-1-1-1-1           | <b>397</b> | 1          |
| 923             | Sri Lanka, Puttalam      | 2011 | Prawn               | 153-191-70-19-23-8-1               | 1-1-1-1-1-1-1           | 355        | 1          |
| 924             | Sri Lanka, Madurankuliya | 2011 | Prawn               | 153-191-70-19-23-8-1               | 1-1-1-1-1-1-1           | 355        | 1          |
| 925             | Sri Lanka, Puttalam      | 2011 | Prawn               | 11-117-123- <b>184-159-169-57</b>  | 2-1-1-1- <b>34</b> -1-1 | <b>673</b> | <b>136</b> |
| 926             | Sri Lanka, Madurankuliya | 2011 | Prawn               | <b>169-104-151-73-26-46-94</b>     | 1-1-1-1-1-3-1           | <b>395</b> | 4          |
| 927             | Sri Lanka, Madurankuliya | 2011 | Prawn               | <b>169-104-151-73-26-46-94</b>     | 1-1-1-1-1-3-1           | <b>395</b> | 4          |
| 808             | Pacific                  | 2010 | Mussel              | 5- <b>215-19-120-46-110-23</b>     | 2-1-1-1-1-2-1           | <b>404</b> | 5          |
| 928             | Thailand                 | 2008 | Prawn               | 5-84-115-74-63-159-84              | 2-1-1-1-1-1-1           | 392        | 2          |
| 929             | Bangladesh               | 2008 | Prawn               | 157-124-135-73-19- <b>170-123</b>  | 1-1-1-1-1-1-1           | <b>422</b> | 1          |
| 930             | Vietnam                  | 2008 | Prawn               | 51-4-77-67-60-8-24                 | 2-1-1-1-1-1-1           | <b>423</b> | 2          |
| 931             | India                    | 2008 | Prawn               | <b>170-224-75-139-117-18-124</b>   | 1-1-1-1-1-1-1           | <b>424</b> | 1          |
| 1059            | Indian Ocean             | 2008 | Prawn               | <b>166-211-162-183-50-3-57</b>     | 1-1-1-1-1-2-1           | <b>394</b> | 3          |
| 932             | Bangladesh               | 2008 | Prawn               | 121-50- <b>169-91-10-73-73</b>     | 2-1-1-1-1-1-1           | <b>425</b> | 2          |
| 831             | Thailand                 | 2008 | Prawn               | 55-15-31-55-18-58-46               | 1-1-1-1-1-5-1           | 114        | 10         |
| 933             | Honduras                 | 2008 | Prawn               | 158- <b>223-75-12-26-171-125</b>   | 2-1-1-1-1-1- <b>21</b>  | <b>426</b> | <b>100</b> |
| 934             | Honduras                 | 2008 | Prawn               | 33-87-24-5-10-5-1                  | 1-1-1-1-1-1-1           | 246        | 1          |
| 935             | Vietnam                  | 2009 | Prawn               | <b>171-222-113-126-4-62-23</b>     | 2-1-1-1-1-1-1           | <b>428</b> | 2          |
| 832             | Thailand                 | 2009 | Prawn               | 119-152-135-29-23-11-61            | 2-1-1-1-1-1-1           | <b>391</b> | 2          |
| 805             | Bangladesh               | 2010 | Prawn               | 33-22-24-5-10-5-1                  | 1-1-1-1-1-1-1           | 56         | 1          |
| 833             | Vietnam                  | 2010 | Prawn               | 2-113-72-94-26-83-23               | 1-1-1-1-1-2-1           | <b>411</b> | 3          |
| 810             | Bangladesh               | 2011 | Prawn               | 31-4-60- <b>180-31-62-120</b>      | 1-1-1-1-1-1-2           | <b>405</b> | 6          |
| 812             | Thailand                 | 2011 | Prawn               | <b>168-210-161-182-61-162-38</b>   | 2-1-1-1-1-1-1           | <b>406</b> | 2          |
| 1046            | Netherlands, North Sea   | 2011 | Prawn               | <b>221-298-31-226-26-171-37</b>    | 2-1-1-1-1-1-1           | <b>545</b> | 2          |
| 1047            | Denmark                  | 2011 | Prawn               | 119-151- <b>197-79-4-205-105</b>   | 2-1-1-1-1-1-1           | <b>537</b> | 2          |

| id <sup>B</sup> | Origin                 |      |                     | Allelic profile <sup>A</sup>                        |                         |            |            |
|-----------------|------------------------|------|---------------------|-----------------------------------------------------|-------------------------|------------|------------|
|                 | Country, Region        | Year | Source <sup>C</sup> | Nucleotide                                          | Peptide                 | ST         | pST        |
| 1048            | Denmark                | 2011 | Prawn               | 119-151- <b>197</b> -79-4- <b>205</b> -105          | 2-1-1-1-1-1-1           | <b>537</b> | 2          |
| 1049            | Denmark                | 2011 | Prawn               | 119-151- <b>168</b> -201-4- <b>205</b> -105         | 2-1-1-1-1-1-1           | <b>538</b> | 2          |
| 813             | Vietnam                | 2011 | Prawn               | 102- <b>212</b> -91- <b>182</b> -61- <b>162</b> -38 | 2-1-1-1-1-1-1           | <b>407</b> | 2          |
| 814             | China                  | 2011 | Prawn               | 111- <b>188-164</b> -149- <b>115-164-118</b>        | 1-1-1-1-1- <b>36</b> -1 | <b>408</b> | <b>60</b>  |
| 834             | Vietnam                | 2011 | Prawn               | 109-136-114-121-83-107-83                           | 2-1-1-1-1-2-1           | 233        | 5          |
| 835             | Ecuador                | 2011 | Prawn               | 142-29-10-7-14-24-20                                | 1-1-1-1-1-1-2           | <b>412</b> | 6          |
| 836             | Bangladesh             | 2011 | Prawn               | 35-154-25-50-73-35-23                               | 1-1-1-1-1-4-1           | 253        | 11         |
| 837             | Germany, Baltic Sea    | 2011 | Water               | 3-2-82-50-4-78-66                                   | 2-1-1-1-1-1-1           | 121        | 2          |
| 838             | Germany, Baltic Sea    | 2011 | Seaweed             | 35-43-38-21-31-35-37                                | 1-1-1-1-1-4-1           | 79         | 11         |
| 839             | Germany, Baltic Sea    | 2011 | Sand                | 3-2-82-50-4-78-66                                   | 2-1-1-1-1-1-1           | 121        | 2          |
| 840             | Germany, Baltic Sea    | 2011 | Water               | 3-2-82-50-4-78-66                                   | 2-1-1-1-1-1-1           | 121        | 2          |
| 841             | Germany, Baltic Sea    | 2011 | Water               | 3-2-82-50-4-78-66                                   | 2-1-1-1-1-1-1           | 121        | 2          |
| 1050            | Ecuador                | 2011 | Prawn               | 31- <b>299-198</b> -19-26- <b>206</b> -18           | 1-1-1-1-1-2-1           | <b>539</b> | 3          |
| 1051            | Ecuador                | 2011 | Prawn               | 42- <b>223</b> -31-12-26- <b>171</b> -57            | 2-1-1-1-1-1-1           | <b>540</b> | 2          |
| 1052            | NE-Atlantic            | 2011 | Prawn               | 17- <b>296</b> -13- <b>224</b> -95-31-26            | 1-1-1-1-1-1-1           | <b>541</b> | 1          |
| 1053            | Netherlands, North Sea | 2011 | Prawn               | 175-16- <b>195-187</b> -31- <b>165</b> -17          | 1-1-1-1-1- <b>21</b> -1 | <b>542</b> | <b>54</b>  |
| 1054            | Ecuador, Machala       | 2012 | Prawn               | 188-106- <b>199-225</b> -2-3-1                      | 2-1-1-1-2-2-1           | <b>543</b> | <b>123</b> |
| 1055            | Ecuador, Machala       | 2012 | Prawn               | 42- <b>297-196</b> -19- <b>137-204</b> -57          | 2-1-1-1- <b>15</b> -1-1 | <b>544</b> | <b>129</b> |
| 1056            | Ecuador, Machala       | 2012 | Prawn               | 42- <b>297-196</b> -19- <b>137-204</b> -57          | 2-1-1-1- <b>15</b> -1-1 | <b>544</b> | <b>129</b> |
| 1137            | Ecuador, Machala       | 2012 | Prawn               | 111-7- <b>232</b> -12- <b>166-257-182</b>           | 1-1-1-1- <b>35-3-24</b> | <b>718</b> | <b>79</b>  |
| 1057            | Ecuador, Machala       | 2012 | Prawn               | 42- <b>223</b> -31-12-26- <b>171</b> -57            | 2-1-1-1-1-1-1           | <b>540</b> | 2          |
| 1138            | Ecuador, Machala       | 2012 | Prawn               | 58- <b>332</b> -10-8-28-33- <b>183</b>              | 1-1-1-1-1-1-1           | <b>719</b> | 1          |
| 1139            | Ecuador, Machala       | 2012 | Prawn               | <b>236</b> -40-38-209-28-190-94                     | <b>15</b> -1-1-3-1-18-1 | <b>720</b> | <b>164</b> |
| 1140            | Ecuador, Machala       | 2012 | Prawn               | 60-143- <b>233</b> -29-47-78-17                     | 1-1-1-1-1-1-1           | <b>721</b> | 1          |
| 1141            | Ecuador, Machala       | 2012 | Prawn               | 26-16- <b>234</b> -7-18-32-7                        | 1-1-1-1-1-1-1           | <b>722</b> | 1          |
| 1142            | Ecuador, Balao         | 2012 | Prawn               | 232-141-3-54-160- <b>258</b> -90                    | 2-1-1-1-1-1-6           | <b>723</b> | <b>95</b>  |
| 1143            | Ecuador, Balao         | 2012 | Prawn               | 42- <b>333</b> -74- <b>288</b> -24-171-13           | 2-1-1-1-1-1-1           | <b>724</b> | 2          |
| 1207            | Ecuador, Machala       | 2012 | Prawn               | 28-84-217- <b>290</b> -28- <b>260-184</b>           | 1-1-1-1-1-1- <b>25</b>  | <b>756</b> | <b>41</b>  |
| 1145            | Ecuador, Machala       | 2012 | Prawn               | 26-16- <b>234</b> -7-18-32-7                        | 1-1-1-1-1-1-1           | <b>722</b> | 1          |
| 1146            | Ecuador, Machala       | 2012 | Prawn               | 26-16- <b>234</b> -7-18-32-7                        | 1-1-1-1-1-1-1           | <b>722</b> | 1          |
| 1147            | Ecuador, Machala       | 2012 | Prawn               | 47- <b>335</b> -61- <b>289</b> -114-78-26           | 1-1-1-1-1-1-1           | <b>725</b> | 1          |
| 1149            | Ecuador, Machala       | 2012 | Prawn               | <b>170-224</b> -75-139- <b>117-18-124</b>           | 1-1-1-1-1-1-1           | <b>424</b> | 1          |
| 1148            | Ecuador, Machala       | 2012 | Prawn               | 31- <b>334</b> -3-55-4- <b>259</b> -23              | 1-1-1-1-1-3-1           | <b>755</b> | 4          |
| 1150            | Ecuador, Guayaquil     | 2012 | Prawn               | 26-16- <b>234</b> -7-18-32-7                        | 1-1-1-1-1-1-1           | <b>722</b> | 1          |
| 1151            | Ecuador, Guayaquil     | 2012 | Prawn               | <b>237</b> -165-98- <b>291-167</b> -11-77           | 1-1-1-1-1-1-1           | <b>726</b> | 1          |
| 1152            | Ecuador, Guayaquil     | 2012 | Prawn               | 31-115-200-12- <b>168</b> -91-68                    | 1-1-1-1-1-12-1          | <b>727</b> | 17         |
| 1153            | Ecuador, Guayaquil     | 2012 | Prawn               | 31-115-200-12- <b>168</b> -91-68                    | 1-1-1-1-1-12-1          | <b>727</b> | 17         |
| 1154            | Ecuador, Guayaquil     | 2012 | Prawn               | 28-84-217- <b>290</b> -28- <b>260-184</b>           | 1-1-1-1-1-1- <b>25</b>  | <b>756</b> | <b>41</b>  |
| 1155            | Ecuador, Guayaquil     | 2012 | Prawn               | 5-25-19-61-4-11-24                                  | 2-1-1-1-1-1-1           | 430        | 2          |
| 1156            | Ecuador, Guayaquil     | 2012 | Prawn               | 25-322-13-282-33-32-2                               | 1-1-1-1-1-1-1           | 711        | 1          |
| 1157            | Ecuador, Guayaquil     | 2012 | Prawn               | 196-84-80-124-128-158-12                            | 2-1-1-1-1-14-1          | <b>757</b> | <b>29</b>  |
| 1158            | Ecuador, Guayaquil     | 2012 | Prawn               | 26-16- <b>234</b> -7-18-32-7                        | 1-1-1-1-1-1-1           | <b>722</b> | 1          |
| 1159            | Ecuador, Guayaquil     | 2012 | Prawn               | 232-56-3-23-56-11-36                                | 2-1-1-1-4-1-1           | <b>728</b> | 14         |
| 1211            | Germany, North Sea     | 2011 | Water               | <b>238</b> -106-75-123-30-11-46                     | <b>9</b> -1-1-1-1-1-1   | <b>758</b> | <b>158</b> |
| 1212            | Germany, North Sea     | 2011 | Water               | <b>239</b> -16-13-8-49- <b>261</b> -23              | 4-1-1-1-1-1-1           | <b>759</b> | <b>151</b> |
| 1213            | Germany, North Sea     | 2011 | Water               | 142-16-10-7-14-24-20                                | 1-1-1-1-1-1-2           | <b>760</b> | 6          |
| 1214            | Germany, Baltic Sea    | 2011 | Water               | 4-13-11-91-18-9-23                                  | 2-1-1-1-1-7-1           | 481        | 19         |
| 1215            | Germany, Baltic Sea    | 2011 | Water               | 4-13-11-91-18-9-23                                  | 2-1-1-1-1-7-1           | 481        | 19         |
| 1216            | Germany, Baltic Sea    | 2011 | Water               | 47-52-19-287-24-43-37                               | 1-1-1-1-1-1-1           | <b>761</b> | 1          |
| 1217            | Germany, Baltic Sea    | 2011 | Water               | <b>240-337-240</b> -19- <b>169-262-185</b>          | 4-1-1-1-1-6-1           | <b>762</b> | <b>152</b> |
| 1218            | Germany, Baltic Sea    | 2011 | Water               | 33-280- <b>239-292</b> -23- <b>263</b> -83          | 1-1-1-1-1-1-1           | <b>763</b> | 1          |
| 1219            | Germany, North Sea     | 2011 | Water               | 142-16-10-7-14-24-20                                | 1-1-1-1-1-1-2           | <b>760</b> | 6          |
| 1220            | Germany, North Sea     | 2011 | Water               | 142-16-10-7-14-24-20                                | 1-1-1-1-1-1-2           | <b>760</b> | 6          |
| 1221            | Germany, North Sea     | 2011 | Water               | 27-327-13-23-33-32-2                                | 1-1-1-1-1-1-1           | <b>764</b> | 1          |
| 1222            | Denmark, North Sea     | 2011 | Phytopl.            | 27-327-13-23-33-32-2                                | 1-1-1-1-1-1-1           | <b>764</b> | 1          |
| 1223            | Denmark, Skagerrak     | 2011 | Water               | 61-117-35-19-26-92- <b>186</b>                      | 1-1-1-1-1-13-1          | <b>765</b> | <b>48</b>  |
| 1224            | Denmark, Kattegat      | 2011 | Water               | 26-330-223- <b>293</b> -28- <b>264</b> -104         | 1-1-1-1-1-2-1           | <b>774</b> | 3          |
| 1225            | Denmark, Kattegat      | 2011 | Zoopl.              | 22- <b>338-241</b> -205-4- <b>265</b> -86           | 2-1-1-1-1- <b>41</b> -1 | <b>766</b> | <b>119</b> |
| 1226            | Denmark, Kattegat      | 2011 | Phytopl.            | 111-239-205-195-28-46-23                            | 1-1-1-1-1-3-1           | <b>767</b> | 4          |
| 1227            | Germany, Baltic Sea    | 2011 | Water               | 29- <b>339</b> -75-123-30-18-46                     | 1-1-1-1-1-1-1           | <b>768</b> | 1          |
| 1228            | Germany, Baltic Sea    | 2011 | Zoopl.              | 17-16-13-7-24-16-20                                 | 1-1-1-1-1-1-2           | 28         | 6          |
| 1229            | Germany, Baltic Sea    | 2011 | Sediment            | 196-84-80- <b>294-170</b> -158-12                   | 2-1-1-1-1-14-1          | <b>769</b> | <b>29</b>  |
| 1230            | Germany, Baltic Sea    | 2011 | Water               | 4-13-11-91-18-9-23                                  | 2-1-1-1-1-7-1           | 481        | 19         |
| 1231            | Germany, Baltic Sea    | 2011 | Water               | 97-287-150-243-142-229- <b>187</b>                  | 2-1-1-1-1-1-1           | <b>770</b> | 2          |

| id <sup>B</sup> | Origin              |      |                     | Allelic profile <sup>A</sup>           |                       |            |            |
|-----------------|---------------------|------|---------------------|----------------------------------------|-----------------------|------------|------------|
|                 | Country, Region     | Year | Source <sup>C</sup> | Nucleotide                             | Peptide               | ST         | pST        |
| 1232            | Germany, Baltic Sea | 2011 | Phytopl.            | 20- <b>296</b> -3-187-26-6-2           | 1-1-1-1-1-5-1         | <b>771</b> | 10         |
| 1233            | Germany, Baltic Sea | 2011 | Water               | 47-58-53-19-50-37-26                   | 1-1-1-1-1-2-1         | 162        | 3          |
| 1234            | Germany, Baltic Sea | 2011 | Water               | 17- <b>340</b> -6- <b>295</b> -94-23-7 | 1-1-1-1-1-1-1         | <b>773</b> | 1          |
| 1235            | Germany, Baltic Sea | 2011 | Water               | 4-13-11-91-18-9-23                     | 2-1-1-1-1-7-1         | 481        | 19         |
| 1236            | Germany, North Sea  | 2011 | Water               | <b>238</b> -106-75-123-30-11-46        | <b>9</b> -1-1-1-1-1-1 | <b>758</b> | <b>158</b> |

Numbers in bold in the allelic profile, ST and pST correspond to sequences or types newly described.

<sup>A</sup> Allelic profile on basis of nucleotide and peptide sequences. Order of fragments: *dnaE*, *gyrB*, *recA*, *dtdS*, *pntA*, *pyrC*, *tnaA* and p\_*dnaE*, p\_*gyrB*, p\_*recA*, p\_*dtdS*, p\_*pntA*, p\_*pyrC*, p\_*tnaA*.

<sup>B</sup> id of the isolate as assigned by the pubMLST database after submission

<sup>C</sup> Phytopl. = Phytoplankton, Zoopl. = Zooplankton
