# Supplementary material for: Population analysis of Vibrio parahaemolyticus originating from different geographical regions demonstrates a high genetic diversity
Source: PubMed Central journal article supplement (PMC4015679; doi:10.1186/1471-2180-14-59), 2014-03-08

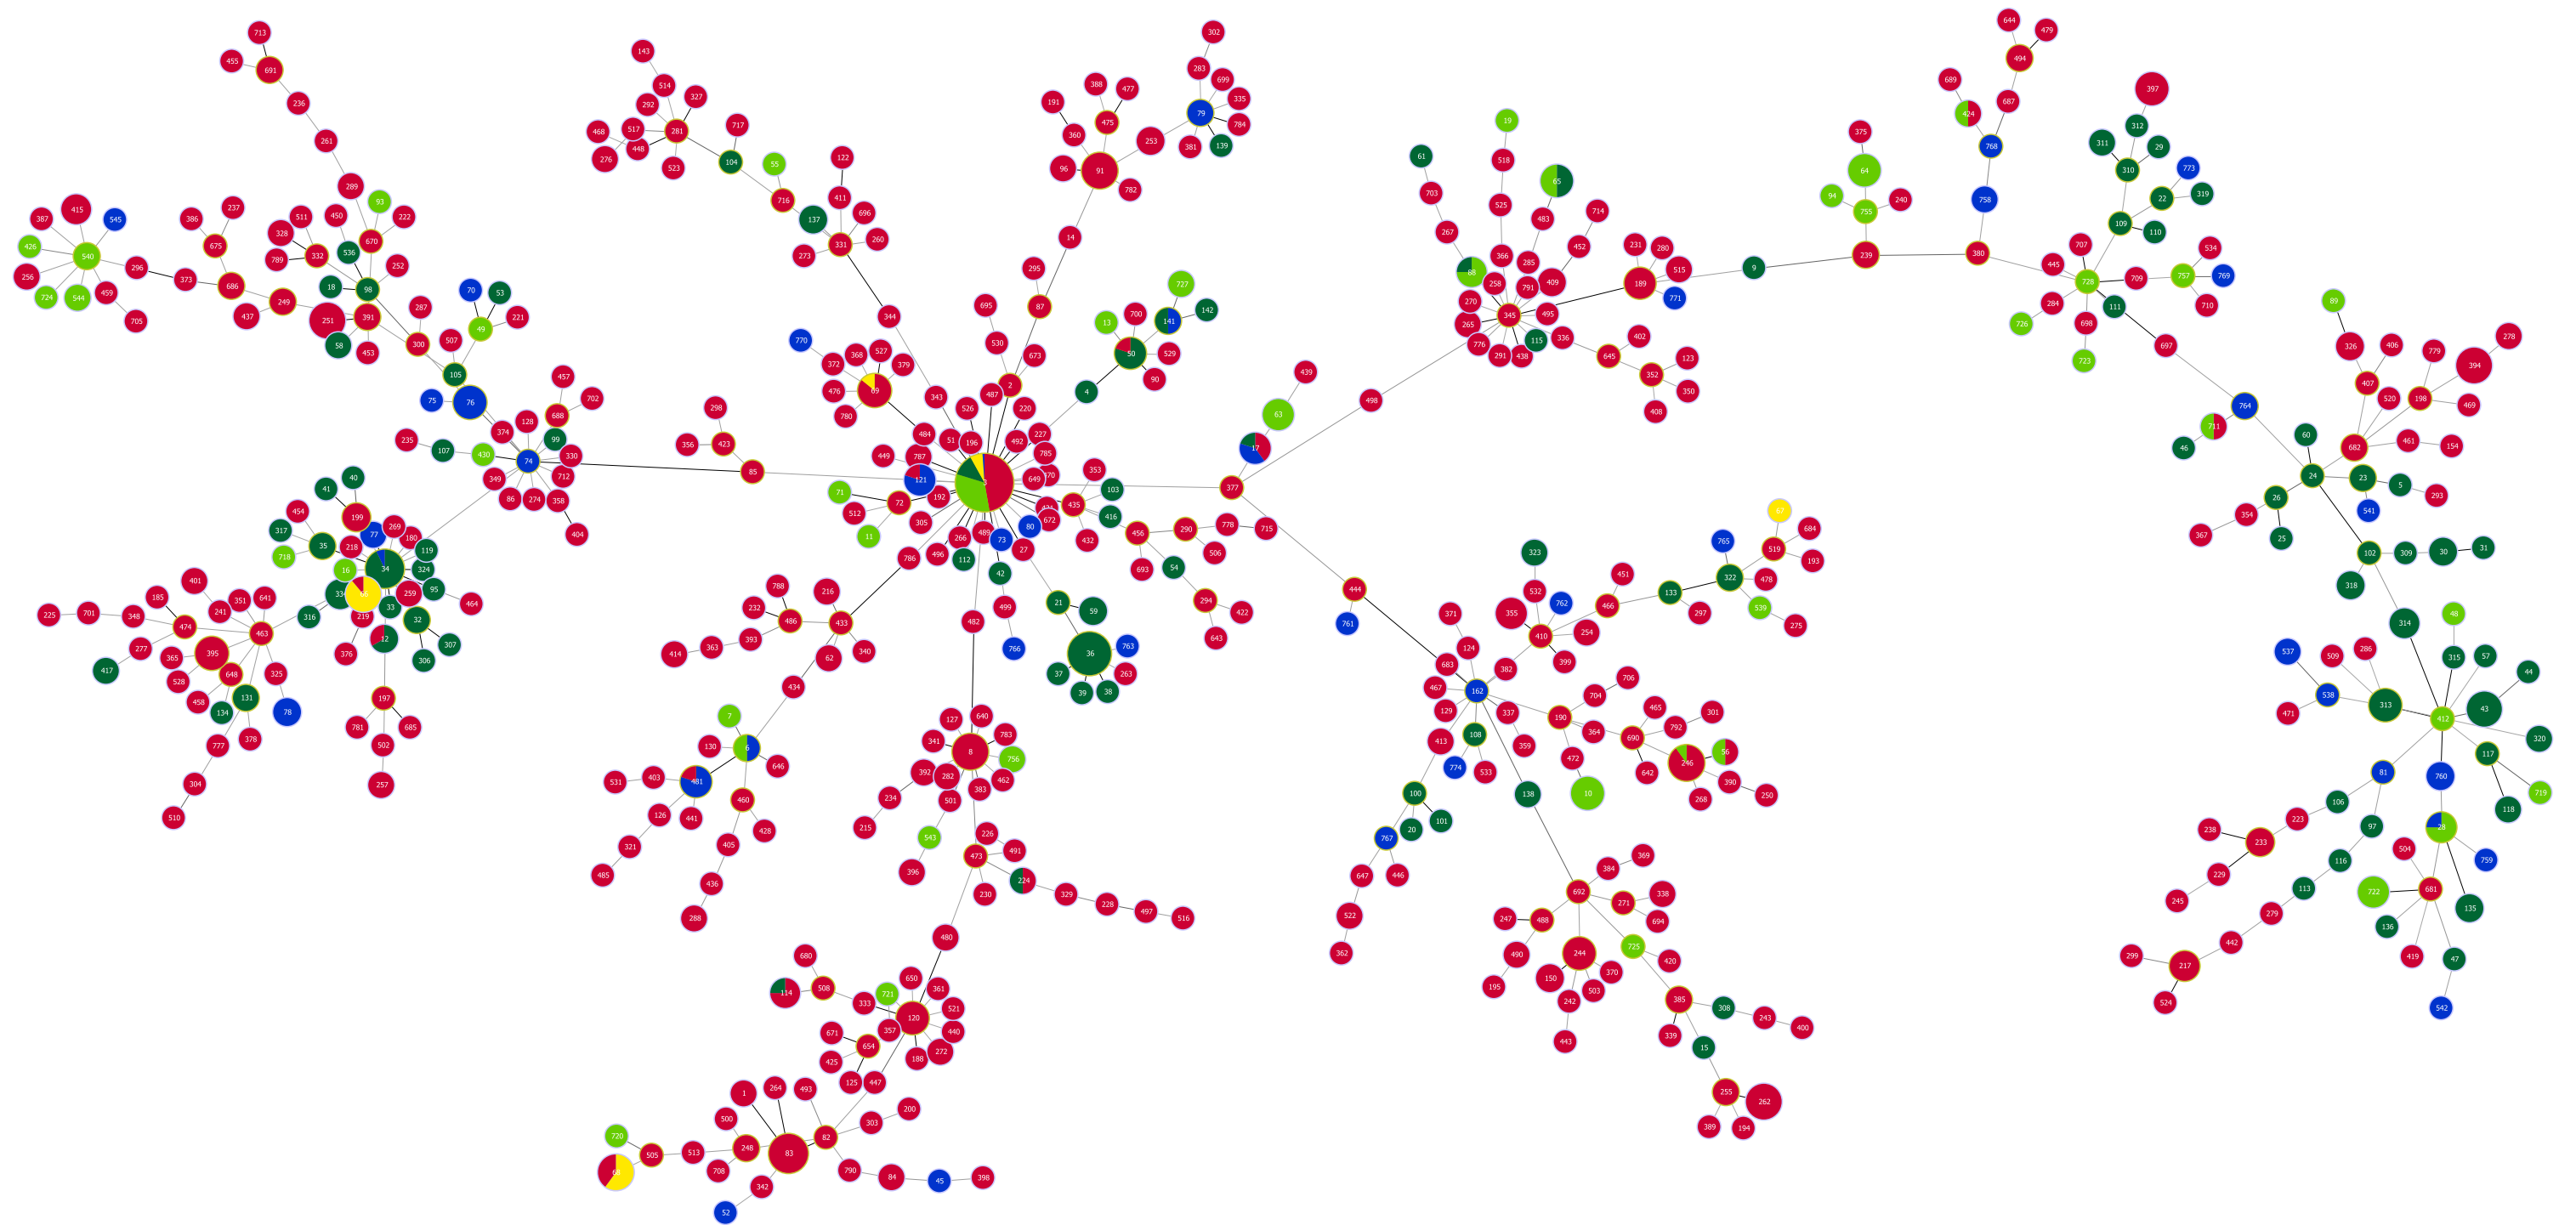

Supplement: 1471-2180-14-59-S4.pdf [file 1471-2180-14-59-S4.pdf]
